# Supplementary material for: Downsizing the K-CHA zeolite by a postmilling-recrystallization method for enhanced base-catalytic performance
Source: Royal Society of Chemistry journal article supplement (doi:10.1039/c5nj02052b), 2015-11-06
Supplement: c5nj02052b1.pdf [file c5nj02052b1.pdf]

ELECTRONIC SUPPLEMENTARY MATERIAL (ESI) FOR NEW JOURNAL OF CHEMISTRY. THIS JOURNAL IS © THE ROYAL SOCIETY OF CHEMISTRY AND THE CENTRE NATIONAL DE LA RECHERCHE SCIENTIFIQUE 2015

Supplementary Information, New Journal of Chemistry

### Downsizing K-CHA zeolite by a postmilling-recrystallization method for enhanced base-catalytic performance

Chokkalingam Anand,<sup>a</sup> Takeshi Kaneda,<sup>b</sup> Satoshi Inagaki,<sup>c</sup> Sae Okamura,<sup>c</sup> Hiroki Sakurai,<sup>c</sup> Kyosuke Sodeyama,<sup>a</sup> Taiji Matsumoto,<sup>b</sup> Yoshihiro Kubota,<sup>c</sup> Tatsuya Okubo<sup>a</sup> and Toru Wakihara<sup>a\*</sup>

<sup>a</sup>Department of Chemical System Engineering, The University of Tokyo, 7-3-1 Hongo, Bunkyo-ku, Tokyo 113-8656, Japan.

<sup>b</sup>Department of Materials Technology, Industrial Technology Centre of Tochigi Prefecture, 1-5-20, Yuinomori, Utsunomiya, 321-3226, Japan.

<sup>c</sup>Division of Materials Science and Chemical Engineering, Yokohama National University, 79-5 Tokiwadai, Hodogaya-ku, Yokohama 240-8501, Japan.

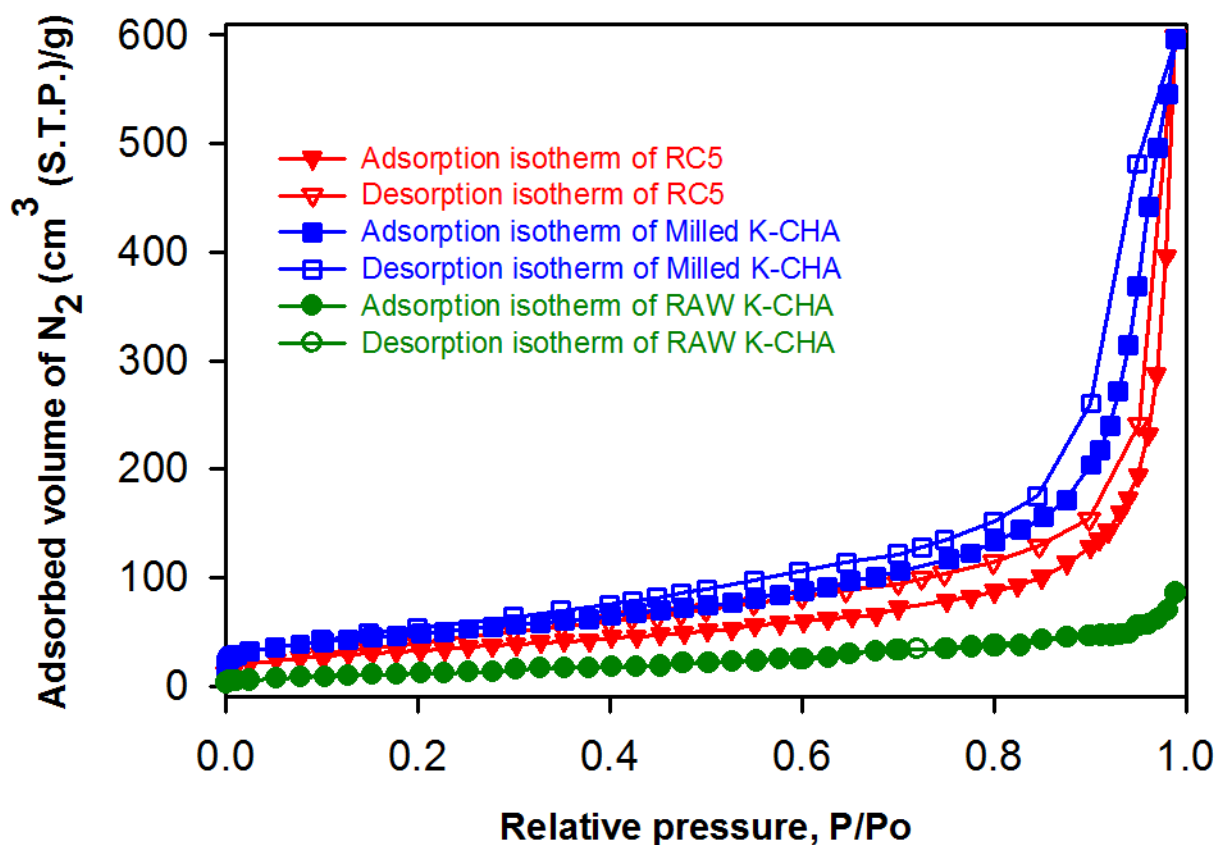

Fig. S1 N<sub>2</sub> adsorption-desorption isotherms of raw, milled and RC5 K-CHA samples.

**Table S1.** Comparison of catalytic performance of K-CHA samples

| Sample | 2M KOH added (g) | RC temperature (K) | RC duration (hour) | Crystallinity (%) | Yield (%) | BET surface area (m <sup>2</sup> g <sup>-1</sup> ) | Product yield in the catalytic reaction (%) <sup>a</sup> |
|--------|------------------|--------------------|--------------------|-------------------|-----------|----------------------------------------------------|----------------------------------------------------------|
| Raw    | 0                | 0                  | 0                  | 100               | 100       | 11                                                 | 35                                                       |
| Milled | 0                | 0                  | 0                  | 11                | 100       | 96                                                 | 46                                                       |
| RC1    | 0.4              | 413                | 5                  | 46                | 94        | 110                                                | 50                                                       |
| RC4    | 1.2              | 413                | 2                  | 79                | 92        | 77                                                 | 61                                                       |
| RC5    | 1.2              | 413                | 5                  | 80                | 91        | 65                                                 | 80                                                       |

a. Reaction conditions: catalyst, 30 mg; temperature, 353 K; time, 60 min; benzaldehyde, 1.2 mmol (130 mg); ethyl cyanoacetate, 1.4 mmol (160 mg); solvent, EtOH (ca. 3.0 mL).

## Results and Discussion

The average surface area for H-CHA samples is approximately between 500-600 m<sup>2</sup> g<sup>-1</sup>, (see references below) majority of which are confined into their microporous region. However, impregnation of potassium tends to block the microporous entrances of the K-CHA zeolite prohibiting the detection of these surfaces during N<sub>2</sub> adsorption-desorption analysis. Therefore, the surface area of K-CHA samples listed in Table 2 and Table S1, presumably is due to the external surface area as observed from their respective N<sub>2</sub> adsorption-desorption isotherms displayed in Figure S1. In addition, Figure S1 shows a variation in the volume of nitrogen adsorbed (y axis) by K-CHA samples relative to their respective surface areas (Table 2) and particle size differences (Fig. 2).

Table S1 compares the catalytic performances of raw, milled and recrystallized K-CHA samples. The catalytic yield increased from 35 to 80 % as a result of bead-milling and postmilling-recrystallization. The KOH content, time and temperature used for recrystallizing RC5 were found to be optimum as it yielded 80% catalytic product. Further, the lower yield of RC4 (61%), while possessing crystallinity equivalent to RC5, strongly reiterates the fact that the recrystallization conditions (longer RC duration, 5 hours) used for RC5 is highly inevitable for enhanced catalytic performance.

## References

- 1 H.-X. Li, W. E. Cormier, B. Moden, EU Patent 2512988, 2011.
- 2 F. N. Ridha, Y. Yang, P. A. Webley, *Micropor. Mesopor. Mater.*, 2009, **117**, 497.
